# Supplementary material for: The unique catalytic role of water in aromatic C–H activation at neutral pH: a combined NMR and DFT study of polyphenolic compounds
Source: Royal Society of Chemistry journal article supplement (doi:10.1039/d0cp02826f), 2020-01-01
Supplement: d0cp02826f1.pdf [file d0cp02826f1.pdf]

*Electronic Supplementary Information*

## The unique catalytic role of water in aromatic C–H activation at neutral pH: a combined NMR and DFT study of polyphenolic compounds

Aneela Fayaz,<sup>a</sup> Michael G. Siskos,<sup>\*b</sup> Panayiotis C. Varras,<sup>b</sup> M. Iqbal Choudhary,<sup>a,c,d</sup> Atia-tul-Wahab,<sup>c</sup> and Ioannis P. Gerothanassis<sup>ID\*a,b,c</sup>

<sup>a</sup> *H.E.J. Research Institute of Chemistry, International Center for Chemical and Biological Sciences, University of Karachi, Karachi -75270, Pakistan. E-mail: [igeroth@uoi.gr](mailto:igeroth@uoi.gr); [msiskos@uoi.gr](mailto:msiskos@uoi.gr)*

<sup>b</sup> *Section of Organic Chemistry and Biochemistry, Department of Chemistry, University of Ioannina, Ioannina, GR-45110, Greece*

<sup>c</sup> *Panjwani Center for Molecular Medicine and Drug Research, International Center for Chemical and Biological Sciences, University of Karachi, Karachi -75270, Pakistan*

<sup>d</sup> *Department of Biochemistry, Faculty of Science, King Abdul-Aziz University, Jeddah-21589, Saudi Arabia*

<sup>†</sup>Electronic supplementary information (ESI) available: pK<sub>a</sub> values, NBO charges, H/D exchange of catechin and resorcinol, isomers of resorcinol, DFT structures of the ground and transition states of resorcinol and phloroglucinol, computed  $\Delta H^\ddagger$ ,  $T\Delta S^\ddagger$  and  $\Delta G^\ddagger$  values

**Table S1** pK<sub>a</sub> values of the molecules investigated in the present work

| Compound                     | pK <sub>a1</sub> | pK <sub>a2</sub> | pK <sub>a3</sub> |
|------------------------------|------------------|------------------|------------------|
| Catechin <sup>45</sup>       | 8.68±0.23        | 9.70±0.24        | 11.55±0.20       |
| Resorcinol <sup>46</sup>     | 9.20             | 10.9             |                  |
| Phloroglucinol <sup>47</sup> | 8.0              | 9.2              | 14               |

**Table S2** Activation enthalpy ( $\Delta H^\ddagger$ ), activation entropy ( $\Delta S^\ddagger$ ), and Gibbs free energies ( $\Delta G^\ddagger$ ) of catechin (**a**), resorcinol (**b**), and phloroglucinol (**c**): (i) in vacuo, (ii) IEF-PCM (H<sub>2</sub>O), (iii) with one explicit H<sub>2</sub>O molecule, and (iv) with two explicit H<sub>2</sub>O molecules

| Complex                                              | Position         | B3LYP/6-31+G(d)                               |                                                 |                                               | PBE1PBE/6-31+G(d)                             |                                                 |                                               |
|------------------------------------------------------|------------------|-----------------------------------------------|-------------------------------------------------|-----------------------------------------------|-----------------------------------------------|-------------------------------------------------|-----------------------------------------------|
|                                                      |                  | $\Delta H^\ddagger$<br>kcal mol <sup>-1</sup> | $-T\Delta S^\ddagger$<br>kcal mol <sup>-1</sup> | $\Delta G^\ddagger$<br>kcal mol <sup>-1</sup> | $\Delta H^\ddagger$<br>kcal mol <sup>-1</sup> | $-T\Delta S^\ddagger$<br>kcal mol <sup>-1</sup> | $\Delta G^\ddagger$<br>kcal mol <sup>-1</sup> |
| Resorcinol + H <sub>2</sub> O (Vacuum)               | TS_at 2_position | 62.05                                         | 0.37                                            | 62.42                                         | 50.64                                         | 0.28                                            | 50.92                                         |
|                                                      | 2_enone          | 51.19                                         | 0.65                                            | 51.8                                          | 49.27                                         | 1.00                                            | 50.28                                         |
|                                                      | TS_at 4_position | 61.16                                         | 0.39                                            | 61.55                                         | 49.76                                         | 0.30                                            | 50.06                                         |
|                                                      | 4_enone          | 51.27                                         | 0.93                                            | 52.20                                         | 49.68                                         | 0.98                                            | 50.67                                         |
| Resorcinol (Water Cont. Med)                         | TS_at 2_position | 61.67                                         | 0.31                                            | 61.98                                         | 61.09                                         | 0.30                                            | 61.39                                         |
|                                                      | 2_enone          | 52.39                                         | 0.85                                            | 53.25                                         | 50.69                                         | 0.91                                            | 51.60                                         |
|                                                      | TS_at 4_position | 61.02                                         | 0.35                                            | 61.37                                         | 60.47                                         | 0.34                                            | 60.81                                         |
|                                                      | 4_enone          | 53.14                                         | 0.81                                            | 53.14                                         | 51.47                                         | 0.86                                            | 52.33                                         |
| Resorcinol + 1H <sub>2</sub> O (Vacuum)              | TS_at 2_position | 34.08                                         | 4.14                                            | 38.21                                         | 32.04                                         | 4.04                                            | 36.08                                         |
|                                                      | 2_enone          | 23.04                                         | 4.01                                            | 27.06                                         | 20.11                                         | 3.93                                            | 24.04                                         |
|                                                      | TS_at 4_position | 33.45                                         | 4.14                                            | 37.59                                         | 31.45                                         | 4.04                                            | 35.49                                         |
|                                                      | 4_enone          | 33.46                                         | 5.63                                            | 39.09                                         | 21.29                                         | 3.82                                            | 25.11                                         |
| Resorcinol + 1H <sub>2</sub> O (Water Cont. Med)     | TS_at 2_position | 35.31                                         | 3.34                                            | 38.65                                         | 33.31                                         | 3.17                                            | 36.48                                         |
|                                                      | 2_enone          | 25.17                                         | 5.63                                            | 30.80                                         | 21.60                                         | 4.50                                            | 26.10                                         |
|                                                      | TS_at 4_position | 34.93                                         | 3.38                                            | 38.32                                         | 33.23                                         | 3.19                                            | 36.42                                         |
|                                                      | 4_enone          | 26.43                                         | 4.32                                            | 30.75                                         | 22.92                                         | 4.22                                            | 27.14                                         |
| Resorcinol + 2H <sub>2</sub> O (Vacuum)              | TS_at 2_position | 26.73                                         | 3.96                                            | 30.69                                         | 24.40                                         | 3.52                                            | 27.92                                         |
|                                                      | 2_enone          | 15.93                                         | 4.08                                            | 20.01                                         | 12.57                                         | 4.00                                            | 16.57                                         |
|                                                      | TS_at 4_position | 26.08                                         | 3.71                                            | 29.79                                         | 24.12                                         | 3.44                                            | 27.56                                         |
|                                                      | 4_enone          | 17.27                                         | 4.30                                            | 21.57                                         | 13.8                                          | 4.16                                            | 18.02                                         |
| Resorcinol + 2H <sub>2</sub> O (Water Cont. Med)     | TS_at 2_position | 24.77                                         | 3.67                                            | 28.44                                         | 22.86                                         | 3.25                                            | 26.11                                         |
|                                                      | 2_enone          | 16.00                                         | 5.96                                            | 21.96                                         | 12.47                                         | 4.21                                            | 16.68                                         |
|                                                      | TS_at 4_position | 26.04                                         | 5.03                                            | 31.07                                         | 23.84                                         | 4.61                                            | 28.45                                         |
|                                                      | 4_enone          | 17.46                                         | 5.89                                            | 23.35                                         | 13.90                                         | 4.65                                            | 18.55                                         |
| Phloroglucinol (Vacuum)                              | TS_at 2_position | 58.27                                         | 0.49                                            | 58.75                                         | 57.30                                         | 0.46                                            | 57.76                                         |
|                                                      | 2_enone          | 51.57                                         | 0.86                                            | 52.43                                         | 49.98                                         | 0.89                                            | 50.87                                         |
| Phloroglucinol (Water Cont. Med)                     | TS_at 2_position | 57.76                                         | 0.45                                            | 58.21                                         | 57.00                                         | 0.43                                            | 57.43                                         |
|                                                      | 2_enone          | 52.41                                         | 0.75                                            | 54.16                                         | 51.75                                         | 0.80                                            | 52.54                                         |
| Phloroglucinol + 1H <sub>2</sub> O (Vacuum)          | TS_at 2_position | 30.21                                         | 4.19                                            | 34.40                                         | 28.08                                         | 4.14                                            | 32.22                                         |
|                                                      | 2_enone          | 23.99                                         | 4.10                                            | 28.09                                         | 21.20                                         | 4.66                                            | 25.86                                         |
| Phloroglucinol + 1H <sub>2</sub> O (Water Cont. Med) | TS_at 2_position | 31.88                                         | 3.55                                            | 35.43                                         | 29.76                                         | 3.32                                            | 33.08                                         |
|                                                      | 2_enone          | 26.89                                         | 3.99                                            | 30.88                                         | 23.56                                         | 4.66                                            | 28.22                                         |
| Phloroglucinol + 2H <sub>2</sub> O (Vacuum)          | TS_at 2_position | 23.38                                         | 4.17                                            | 27.55                                         | 20.97                                         | 3.78                                            | 24.75                                         |

|                                                      |                  |       |      |       |       |      |       |
|------------------------------------------------------|------------------|-------|------|-------|-------|------|-------|
| Phloroglucinol + 2H <sub>2</sub> O (Water Cont. Med) | 2_enone          | 17.47 | 4.30 | 21.77 | 14.20 | 4.13 | 18.33 |
|                                                      | TS_at 2_position | 26.76 | 2.10 | 28.86 | 19.98 | 3.68 | 23.66 |
| Catechin (Vacumm)                                    | 2_enone          | 18.77 | 5.30 | 27.07 | 15.32 | 4.49 | 19.81 |
|                                                      | TS_at 6_position | 56.59 | 1.13 | 57.72 | 57.89 | 0.49 | 58.38 |
| Catechin (Water Cont. Med.)                          | TS_at 8_position | 56.57 | 1.12 | 57.69 | 58.69 | 0.19 | 58.88 |
|                                                      | TS_at 6_position | 57.26 | 0.36 | 57.62 | 57.89 | 0.49 | 58.38 |
| Catechin + 1H <sub>2</sub> O (Vacumm)                | TS_at 8_position | 57.27 | 0.60 | 57.87 | 57.75 | 0.45 | 58.20 |
|                                                      | TS_at 6_position | 28.39 | 4.61 | 33.00 | 25.98 | 4.62 | 30.60 |
| Catechin + 1H <sub>2</sub> O (Water Cont. Med.)      | TS_at 8_position | 28.43 | 5.01 | 33.44 | 26.17 | 4.92 | 31.09 |
|                                                      | TS_at 6_position | 30.74 | 3.50 | 34.14 | 29.04 | 3.52 | 32.56 |
| Catechin + 2H <sub>2</sub> O (Vacumm)                | TS_at 8_position | 29.26 | 4.71 | 33.97 | 27.07 | 4.96 | 32.06 |
|                                                      | TS_at 6_position | 20.55 | 5.17 | 25.72 | 21.59 | 3.81 | 25.40 |
|                                                      | 6_enone          | 16.00 | 4.43 | 20.43 | 12.82 | 4.46 | 17.28 |
|                                                      | TS_at 8_position | 25.00 | 2.39 | 27.39 | 22.99 | 2.75 | 25.74 |
| Catechin + 2H <sub>2</sub> O (Water Cont. Med.)      | 8_enone          | 16.67 | 4.38 | 21.05 | 13.70 | 4.28 | 17.98 |
|                                                      | TS_at 6_position | 23.48 | 4.34 | 27.82 | 20.77 | 4.15 | 24.92 |
|                                                      | 6_enone          | 18.30 | 4.78 | 23.08 | 14.62 | 4.19 | 18.81 |
|                                                      | TS_at 8_position | 23.05 | 2.39 | 25.44 | 20.98 | 1.98 | 22.97 |
|                                                      | 8_enone          | 19.00 | 5.95 | 24.95 | 15.27 | 4.59 | 19.85 |

---

**Table S3** Computed activation enthalpy ( $\Delta H^\ddagger$ ), activation entropy ( $-T\Delta S^\ddagger$ ) and Gibbs activation energies ( $\Delta G^\ddagger$ ), for resorcinol, phloroglucinol, and catechin for various molecular solvation species.

| Functional                                 | Complex                                            | Group      | $\Delta H^\ddagger$<br>kcal mol <sup>-1</sup> | $-T\Delta S^\ddagger$<br>kcal mol <sup>-1</sup> | $\Delta G^\ddagger$<br>kcal mol <sup>-1</sup> |
|--------------------------------------------|----------------------------------------------------|------------|-----------------------------------------------|-------------------------------------------------|-----------------------------------------------|
| PBE1PBE/6-31+G(d)<br>(IEF-PCM water)       | Resorcinol<br>(in-out conformer)                   | C(2)-H     | 61.09                                         | 0.30                                            | 61.39                                         |
|                                            |                                                    | C(4,6)-H   | 60.47                                         | 0.34                                            | 60.81                                         |
| PBE1PBE/6-31+G(d)<br>(IEF-PCM water)       | Resorcinol+2H <sub>2</sub> O<br>(in-out conformer) | C(2)-H     | 22.86                                         | 3.25                                            | 26.11                                         |
|                                            |                                                    | C(4,6)-H   | 23.84                                         | 4.61                                            | 28.45                                         |
| PBE1PBE-GD3BJ/6-31+G(d)<br>(IEF-PCM water) | Resorcinol+2H <sub>2</sub> O<br>(in-out conformer) | C(2)-H     | 22.78                                         | 2.88                                            | 25.66                                         |
|                                            |                                                    | C(4,6)-H   | 20.30                                         | 5.08                                            | 25.38                                         |
| PBE1PBE /6-31+G(d)<br>(IEF-PCM water)      | Resorcinol+4H <sub>2</sub> O<br>(in-out conformer) | C(2)-H     | 22.98                                         | 5.49                                            | 28.47                                         |
|                                            |                                                    | C(4,6)-H   | 27.05                                         | 2.07                                            | 29.12                                         |
| PBE1PBE-GD3BJ/6-31+G(d)<br>(IEF-PCM water) | Resorcinol+4H <sub>2</sub> O<br>(in-out conformer) | C(2)-H     | 29.23                                         | 0.82                                            | 30.06                                         |
|                                            |                                                    | C(4,6)-H   | 26.63                                         | 1.21                                            | 27.84                                         |
| PBE1PBE/6-31+G(d)<br>(IEF-PCM water)       | Resorcinol+4H <sub>2</sub> O<br>(in-in conformer)  | C(2)-H     | 23.69                                         | 2.58                                            | 26.27                                         |
|                                            |                                                    | C(4,6)-H   | -                                             | -                                               | -                                             |
| PBE1PBE-GD3BJ/6-31+G(d)<br>(IEF-PCM water) | Resorcinol+4H <sub>2</sub> O<br>(in-in conformer)  | C(2)-H     | 23.01                                         | 2.57                                            | 25.58                                         |
|                                            |                                                    | C(4,6)-H   | -                                             | -                                               | -                                             |
| PBE1PBE/6-31+G(d)<br>(IEF-PCM water)       | Phloroglucinol<br>+2H <sub>2</sub> O               | C(2,4,6)-H | 19.98                                         | 3.68                                            | 23.66                                         |
| PBE1PBE-GD3BJ/6-31+G(d)<br>(IEF-PCM water) | Phloroglucinol<br>+2H <sub>2</sub> O               | C(2,4,6)-H | 19.35                                         | 3.81                                            | 23.16                                         |
| PBE1PBE/6-31+G(d)<br>(IEF-PCM water)       | Catechin+2H <sub>2</sub> O                         | C(6)-H     | 20.77                                         | 4.15                                            | 24.92                                         |
|                                            |                                                    | C(8)-H     | 20.98                                         | 1.99                                            | 22.97                                         |

**Table S4** Computed activation enthalpy ( $\Delta H^\ddagger$ ), activation entropy ( $-T\Delta S^\ddagger$ ) and Gibbs activation energies ( $\Delta G^\ddagger$ ), for resorcinol + H<sub>2</sub>O.

| Functional                                  | Compound                                           | Group              | $\Delta H^\ddagger$<br>kcal mol <sup>-1</sup> | $-T\Delta S^\ddagger$<br>kcal mol <sup>-1</sup> | $\Delta G^\ddagger$<br>kcal mol <sup>-1</sup> |
|---------------------------------------------|----------------------------------------------------|--------------------|-----------------------------------------------|-------------------------------------------------|-----------------------------------------------|
| M0-62X/6-31+G(d)<br>(IEF-PCM water)         | Resorcinol+2H <sub>2</sub> O<br>(in-out conformer) | C(2)-H<br>C(4,6)-H | 24.47<br>25.41                                | 3.37<br>3.63                                    | 27.84<br>29.03                                |
| $\omega$ B97XD/6-31+G(d)<br>(IEF-PCM water) | Resorcinol+2H <sub>2</sub> O<br>(in-out conformer) | C(2)-H<br>C(4,6)-H | 24.46<br>24.56                                | 4.56<br>4.89                                    | 29.03<br>29.45                                |

**Table S5** Computational values of the different contributions to the total activation entropy  $\Delta S^\ddagger$ : translational entropy  $\Delta S_{\text{Trans}}$ , rotational entropy  $\Delta S_{\text{Rot}}$ , and vibration entropy  $\Delta S_{\text{Vib}}$  (kcal mol<sup>-1</sup>) at the B3LYP/6-31+G(d) and PBE1PBE/6-31+G(d) level

| Solvation species                                    | Position         | B3LYP/6-31+G(d)                                       |                                                     |                                                     | PBE1PBE/6-31+d                                        |                                                     |                                                     |
|------------------------------------------------------|------------------|-------------------------------------------------------|-----------------------------------------------------|-----------------------------------------------------|-------------------------------------------------------|-----------------------------------------------------|-----------------------------------------------------|
|                                                      |                  | $-T\Delta S_{\text{Trans}}$<br>kcal mol <sup>-1</sup> | $-T\Delta S_{\text{Rot}}$<br>kcal mol <sup>-1</sup> | $-T\Delta S_{\text{Vib}}$<br>kcal mol <sup>-1</sup> | $-T\Delta S_{\text{Trans}}$<br>kcal mol <sup>-1</sup> | $-T\Delta S_{\text{Rot}}$<br>kcal mol <sup>-1</sup> | $-T\Delta S_{\text{Vib}}$<br>kcal mol <sup>-1</sup> |
| Resorcinol (Vacumm)                                  | TS_at 2_position | 0                                                     | 0.02                                                | 0.29                                                | 0                                                     | 0.01                                                | 0.27                                                |
|                                                      | TS_at 4_position | 0                                                     | 0.02                                                | 0.37                                                | 0                                                     | 0.02                                                | -0.02                                               |
| Resorcinol (Water Cont. Med)                         | TS_at 2_position | 0                                                     | 0.02                                                | 0.29                                                | 0                                                     | 0.05                                                | 0.27                                                |
|                                                      | TS_at 4_position | 0                                                     | 0.02                                                | 0.32                                                | 0                                                     | 0.02                                                | 0.32                                                |
| Resorcinol + 1H <sub>2</sub> O (Vacumm)              | TS_at 2_position | 0                                                     | 0.16                                                | 3.98                                                | 0                                                     | 0.16                                                | 3.89                                                |
|                                                      | TS_at 4_position | 0                                                     | 0.12                                                | 4.02                                                | 0                                                     | 0.11                                                | 3.92                                                |
| Resorcinol + 1H <sub>2</sub> O (Water Cont. Med)     | TS_at 2_position | 0                                                     | 0.15                                                | 3.19                                                | 0                                                     | 0.14                                                | 3.03                                                |
|                                                      | TS_at 4_position | 0                                                     | 0.11                                                | 3.28                                                | 0                                                     | -0.00                                               | -0.01                                               |
| Resorcinol + 2H <sub>2</sub> O (Vacumm)              | TS_at 2_position | 0                                                     | 0.09                                                | 3.57                                                | 0                                                     | 0.06                                                | 3.42                                                |
|                                                      | TS_at 4_position | 0                                                     | 0.09                                                | 3.57                                                | 0                                                     | 0.09                                                | 3.60                                                |
| Resorcinol + 2H <sub>2</sub> O (Water Cont. Med)     | TS_at 2_position | 0                                                     | 0.06                                                | 3.57                                                | 0                                                     | 0.06                                                | 3.16                                                |
|                                                      | TS_at 4_position | 0                                                     | 0.18                                                | 4.77                                                | 0                                                     | 0.17                                                | 4.41                                                |
| Phloroglucinol (Vacumm)                              | TS_at 2_position | 0                                                     | 0.02                                                | 0.29                                                | 0                                                     | 0.02                                                | 0.29                                                |
| Phloroglucinol (Water Cont. Med)                     | TS_at 2_position | 0                                                     | 0.02                                                | 0.29                                                | 0                                                     | 0.02                                                | 0.29                                                |
| Phloroglucinol + 1H <sub>2</sub> O (Vacumm)          | TS_at 2_position | 0                                                     | 0.13                                                | 4.06                                                | 0                                                     | 0.13                                                | 4.01                                                |
| Phloroglucinol + 1H <sub>2</sub> O (Water Cont. Med) | TS_at 2_position | 0                                                     | 0.12                                                | 3.42                                                | 0                                                     | 0.12                                                | 3.20                                                |
| Phloroglucinol + 2H <sub>2</sub> O (Vacumm)          | TS_at 2_position | 0                                                     | 0.06                                                | 3.87                                                | 0                                                     | 0.06                                                | 3.60                                                |
| Phloroglucinol + 2H <sub>2</sub> O (Water Cont. Med) | TS_at 2_position | 0                                                     | 0.17                                                | 4.77                                                | 0                                                     | 0.06                                                | 3.60                                                |
| Catechin (Vacumm)                                    | TS_at 6_position | 0                                                     | 0.01                                                | 1.11                                                | 0                                                     | 0.01                                                | 0.48                                                |
|                                                      | TS_at 8_position | 0                                                     | 0.01                                                | 1.11                                                | 0                                                     | 0.01                                                | 0.48                                                |
| Catechin (Water Cont. Med)                           | TS_at 6_position | 0                                                     | 0.01                                                | 0.35                                                | 0                                                     | 0.01                                                | 0.48                                                |
|                                                      | TS_at 8_position | 0                                                     | 0.01                                                | 0.59                                                | 0                                                     | 0.01                                                | 0.45                                                |
| Catechin + 1H <sub>2</sub> O (Vacumm)                | TS_at 6_position | 0                                                     | -0.00                                               | -0.02                                               | 0                                                     | -0.00                                               | -0.02                                               |
|                                                      | TS_at 8_position | 0                                                     | -0.00                                               | -0.02                                               | 0                                                     | -0.00                                               | -0.02                                               |
| Catechin + 1H <sub>2</sub> O (Water Cont. Med)       | TS_at 6_position | 0                                                     | -0.00                                               | -0.01                                               | 0                                                     | -0.00                                               | -0.01                                               |
|                                                      | TS_at 8_position | 0                                                     | -0.00                                               | -0.02                                               | 0                                                     | -0.00                                               | -0.2                                                |
| Catechin + 2H <sub>2</sub> O (Vacumm)                | TS_at 6_position | 0                                                     | 0.02                                                | 5.06                                                | 0                                                     | 0.04                                                | 3.57                                                |
|                                                      | TS_at 8_position | 0                                                     | 0.05                                                | 2.68                                                | 0                                                     | 0.06                                                | 2.68                                                |
| Catechin + 2H <sub>2</sub> O (Water Cont. Med)       | TS_at 6_position | 0                                                     | 0.08                                                | 4.47                                                | 0                                                     | 0.03                                                | 3.87                                                |
|                                                      | TS_at 8_position | 0                                                     | 0.06                                                | 2.38                                                | 0                                                     | 0.07                                                | 1.78                                                |

**Table S6** NBO charges of the aromatic carbons involved in H/D exchange of the compounds investigated in the present work using PBE1PBE/B3LYP level of theory

| Compound       | Carbon No  | NBO Charges  |                    |              |
|----------------|------------|--------------|--------------------|--------------|
|                |            | Ground State | (transition state) | Keto Product |
| Catechin       | C(6)-H     | -0.400       | -0.633             | -0.632       |
|                | C(8)-H     | -0.376       | -0.626             | -0.627       |
| Resorcinol     | C(2)-H     | -0.380       | -0.639             | -0.647       |
|                | C(4,6)-H   | -0.368       | -0.621             | -0.633       |
| Phloroglucinol | C(2,4,6)-H | -0.413       | -0.643             | -0.638       |

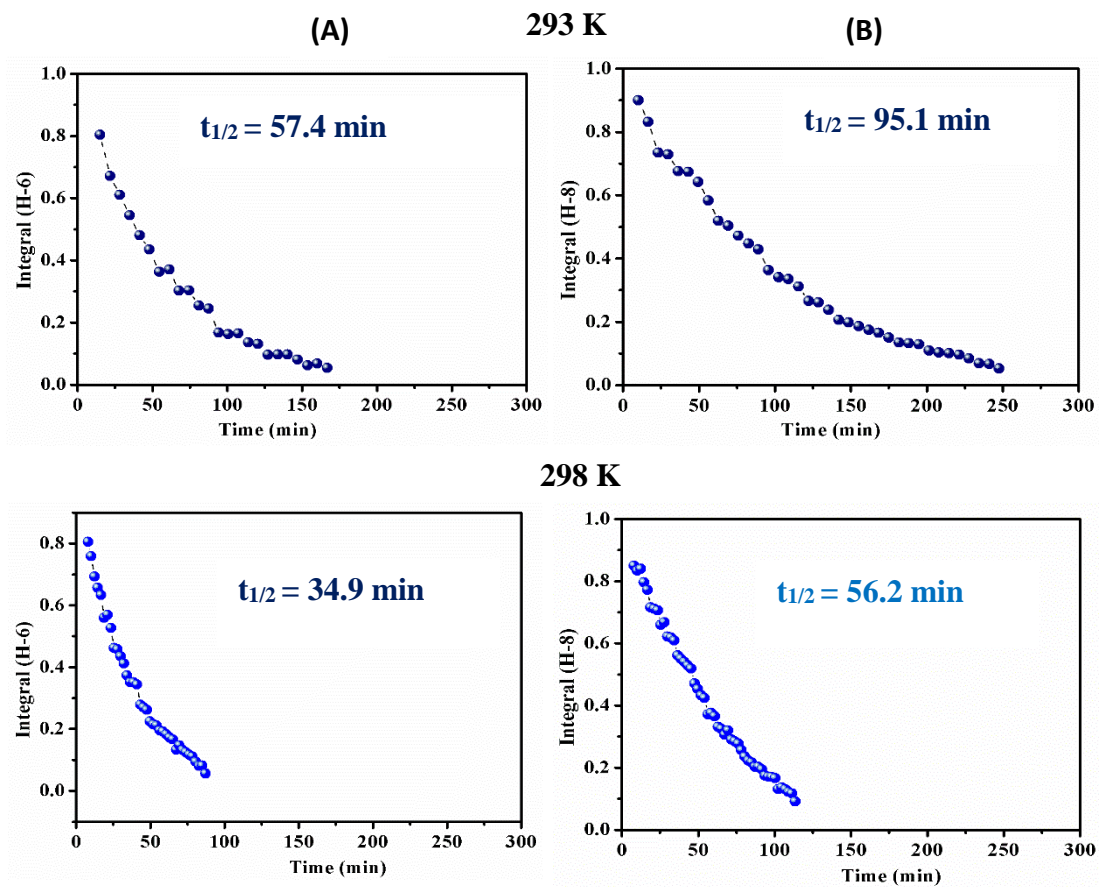

**Fig. S1** H/D exchange of catechin (a). C(6)-H (A) and C(8)-H (B) H/D exchange kinetic curves of 2.5 mM catechin (a) in D<sub>2</sub>O, phosphate buffer solution (25 mM), pD = 8.88 at 298K and 293K.



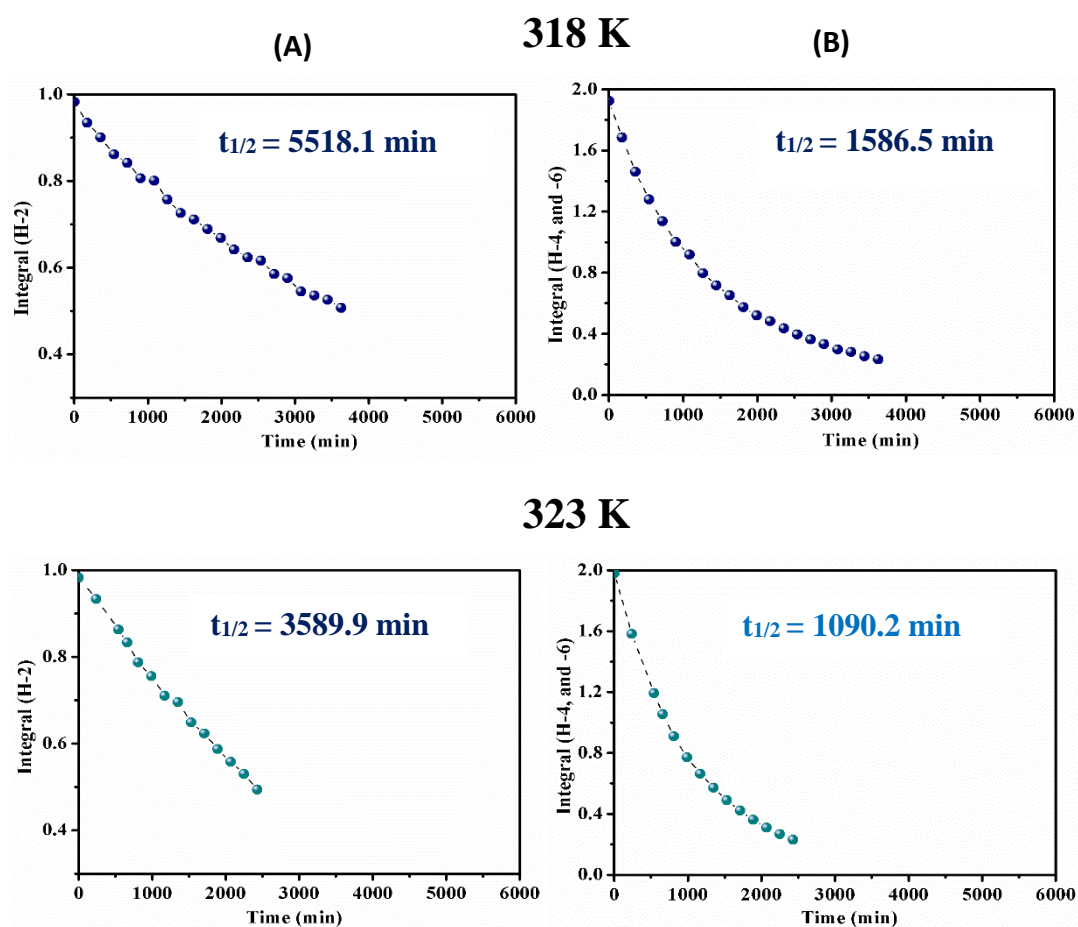

**Fig. S2** H/D exchange of resorcinol (b). C(2)-H and C(4,6)-H H/D exchange kinetic curves of 2.5 mM resorcinol (b) in D<sub>2</sub>O, phosphate buffer solution (25 mM), pD = 9.91 at 318 K and 323 K.

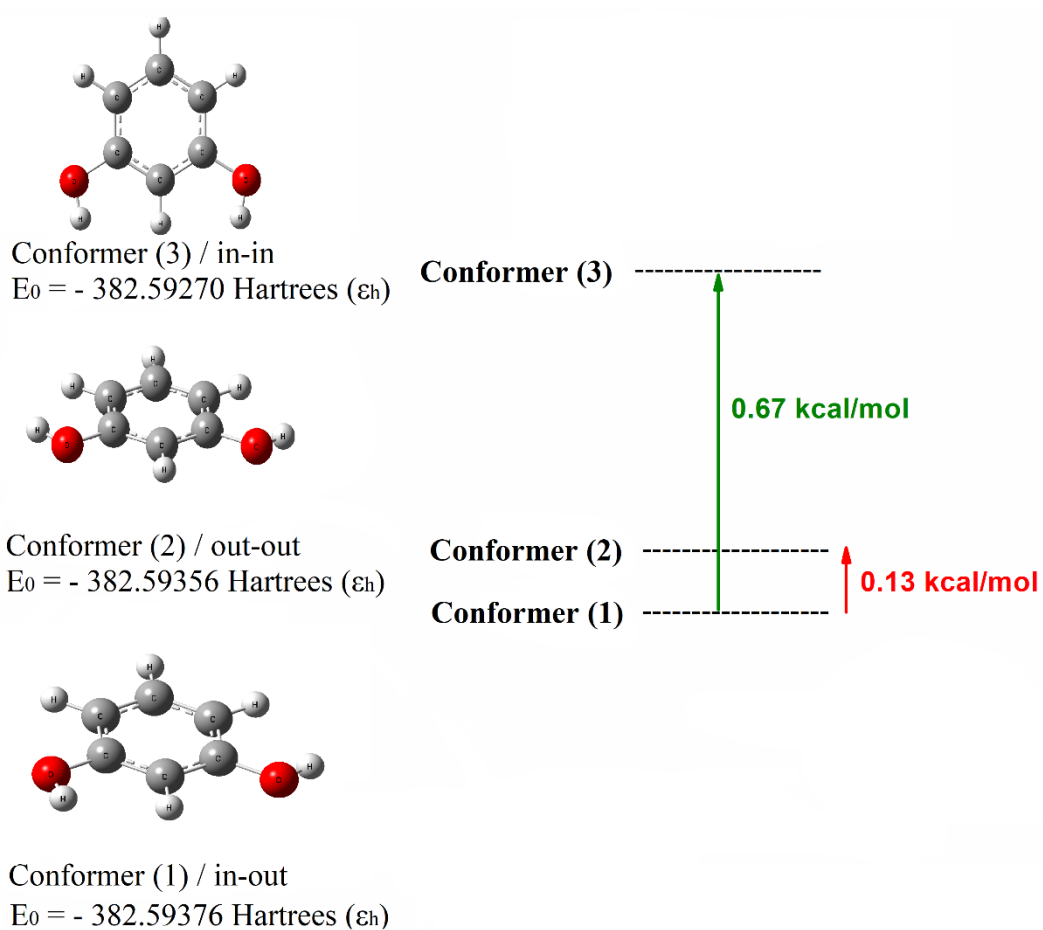

**Fig. S3** Three possible conformers of resorcinol (**b**): (1) in-out, (2) out-out, and (3) in-in, on the basis of placement of OH groups and their respective electronic energies in Hartree.

(A)

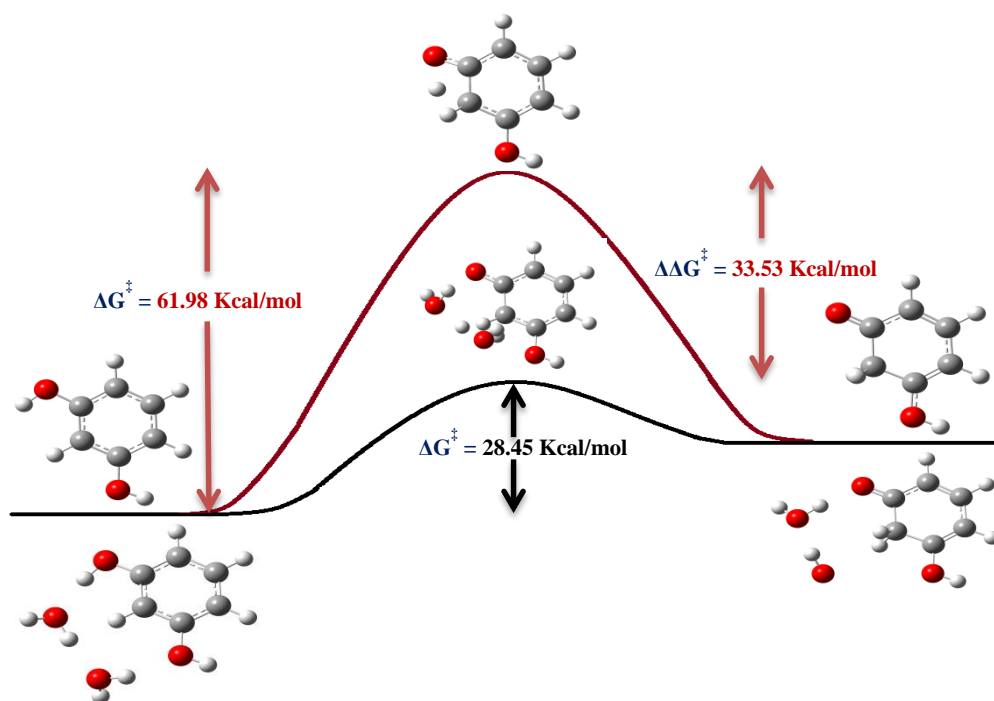

(B)

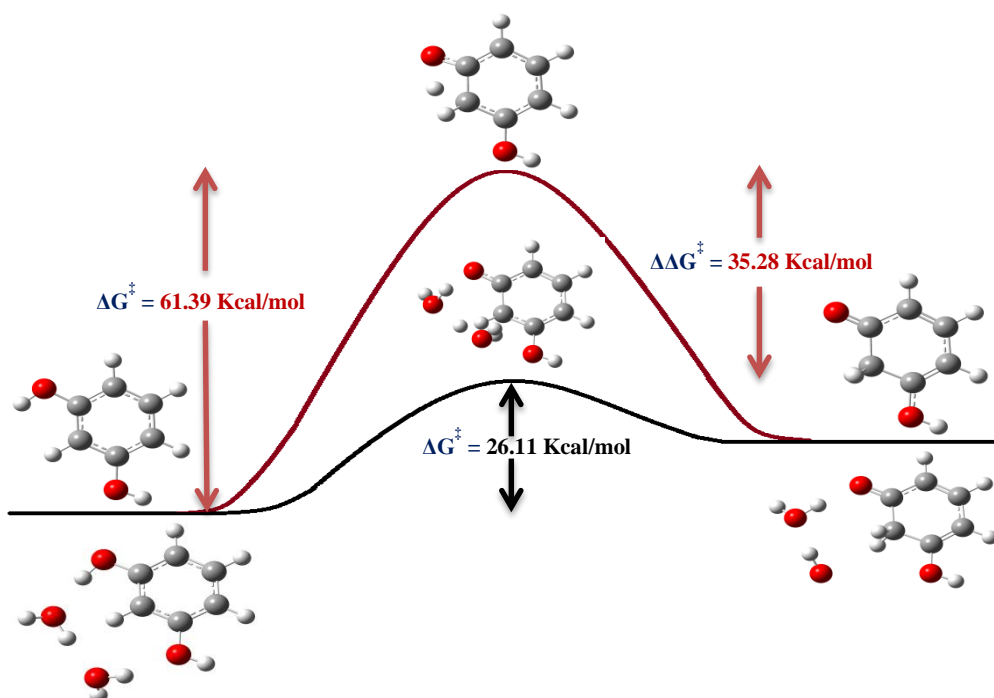

**Fig. S4** DFT structure of the ground state of C(2)–H proton of resorcinol (**b**) with respect to its transition state and keto product, without and with two discrete water molecules at the DFT/B3LYP/6-31+G(d) (IEF-PCM, Water) (A), and DFT/PBE1PBE/6-31+G(d) (IEF-PCM Water) (B) level.

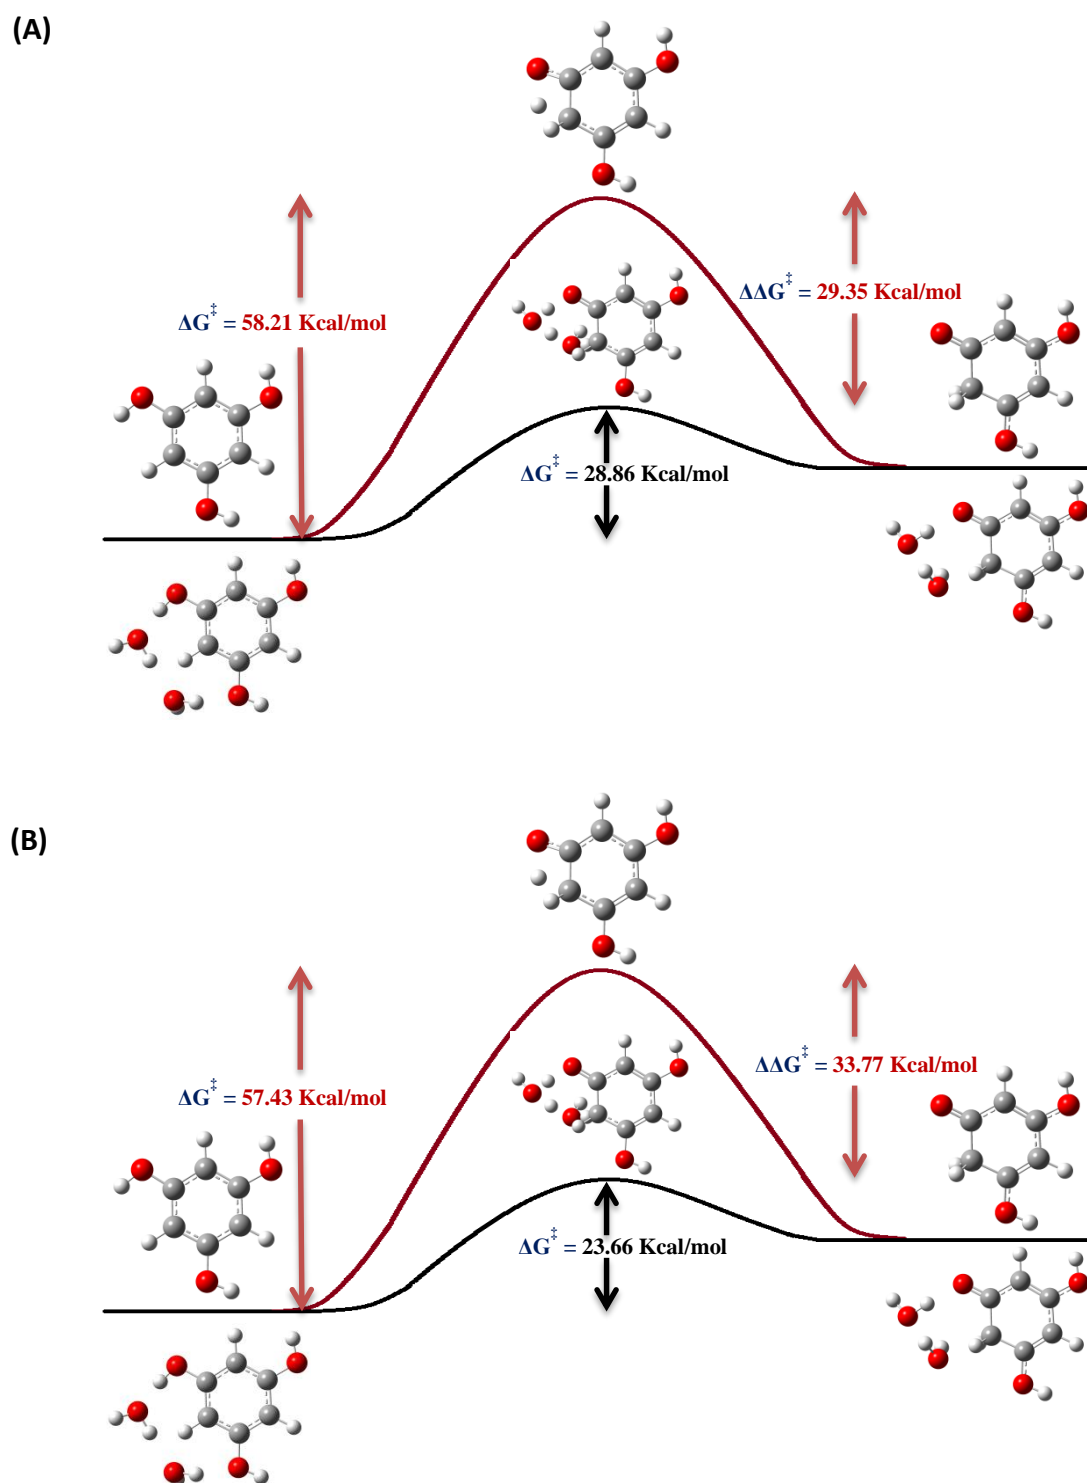

**Fig. S5** DFT structure of the ground state of C(2,4,6)-H proton phloroglucinol (**c**) with respect to its transition state and keto product without and with two discrete water molecules at the DFT/B3LYP/6-31+G(d) (IEF-PCM, Water) (A), and DFT/PBE1PBE/6-31+G(d) (IEF-PCM Water) (B) level.
